# Supplementary material for: Assessment of the Diagnostic Performance of Fully Automated Hepatitis E Virus (HEV) Antibody Tests
Source: MDPI journal article supplement (doi:10.3390/diagnostics14060602), 2024-03-12
Supplement: s1 [file s1]

## Assessment of the Diagnostic Performance of Fully Automated Hepatitis E Virus (HEV) Antibody Tests

Anna Eichhorn<sup>1#</sup>, Franziska Neumann<sup>2#</sup>, Carina Bäumler<sup>2</sup>, Imke Gutschmann<sup>3</sup>, Olaf Grobe<sup>2</sup>, Frieda Schlüter<sup>2</sup>, Sina Müller<sup>2</sup>, Andi Krumbholz<sup>2,3\*</sup>

- 1 DiaSorin Deutschland GmbH, Von-Hevesy-Straße 3, D-63128 Dietzenbach, Germany
- 2 Labor Dr. Krause und Kollegen MVZ GmbH, Steenbeker Weg 23, D-24106 Kiel, Germany
- 3 Institut für Infektionsmedizin, Christian-Albrechts-Universität zu Kiel und Universitätsklinikum  
Schleswig Holstein, Campus Kiel, Brunswiker Straße 4, D-24105 Kiel, Germany

<sup>#</sup> both first authors contributed equally

\* corresponding author: Andi Krumbholz, MD  
krumbholz@infmed.uni-kiel.de  
krumbholz@labor-krause.de

ORCID: 0000-0002-1094-350X (Andi Krumbholz)

**Table S1:** Raw data for the comparison of the MIKROGEN (reference) and DiaSorin HEV IgG immunoassays. Abbreviations: No., number; qual., qualitative; +, positive; (+), borderline.

| No. | MIKROGEN<br><i>recomWell</i> HEV IgG<br>(Positive<br>> 24 U/ml<br>Borderline<br>20 U/ml to 24 U/ml) |       | MIKROGEN<br><i>recomLine</i> HEV IgG | DiaSorin<br>LIAISON® MUREX Anti-HEV IgG<br>(Positive ≥ 0.3 IU/ml) |       |
|-----|-----------------------------------------------------------------------------------------------------|-------|--------------------------------------|-------------------------------------------------------------------|-------|
|     | [U/ml]                                                                                              | qual. | qual.                                | [IU/ml]                                                           | qual. |
| 1   | 29.0                                                                                                | +     | +                                    | 0.5                                                               | +     |
| 2   | 80.4                                                                                                | +     | +                                    | 1.3                                                               | +     |
| 3   | 79.7                                                                                                | +     | +                                    | 2.4                                                               | +     |
| 4   | >125                                                                                                | +     | +                                    | >10                                                               | +     |
| 5   | >125                                                                                                | +     | +                                    | >10                                                               | +     |
| 6   | 113.8                                                                                               | +     | +                                    | 4.5                                                               | +     |
| 7   | >125                                                                                                | +     | +                                    | 3.7                                                               | +     |
| 8   | >125                                                                                                | +     | +                                    | >10                                                               | +     |
| 9   | 89.3                                                                                                | +     | +                                    | 2.4                                                               | +     |
| 10  | 103.2                                                                                               | +     | +                                    | >10                                                               | +     |
| 11  | 103.2                                                                                               | +     | +                                    | 5.4                                                               | +     |
| 12  | 103.2                                                                                               | +     | +                                    | >10                                                               | +     |
| 13  | 71.4                                                                                                | +     | +                                    | 1.3                                                               | +     |
| 14  | 98.8                                                                                                | +     | +                                    | 2.9                                                               | +     |
| 15  | 91.2                                                                                                | +     | +                                    | 3.4                                                               | +     |
| 16  | 80.0                                                                                                | +     | +                                    | 1.9                                                               | +     |
| 17  | 98.8                                                                                                | +     | +                                    | >10                                                               | +     |
| 18  | 89.4                                                                                                | +     | +                                    | 3.1                                                               | +     |
| 19  | 35.1                                                                                                | +     | +                                    | 0.8                                                               | +     |
| 20  | 92.3                                                                                                | +     | +                                    | >10                                                               | +     |
| 21  | 25.4                                                                                                | +     | +                                    | 0.5                                                               | +     |
| 22  | 92.3                                                                                                | +     | +                                    | >10                                                               | +     |
| 23  | 183.2                                                                                               | +     | +                                    | >10                                                               | +     |
| 24  | 40.7                                                                                                | +     | +                                    | 0.6                                                               | +     |
| 25  | 59.5                                                                                                | +     | +                                    | 1.1                                                               | +     |
| 26  | 54.3                                                                                                | +     | +                                    | 0.8                                                               | +     |
| 27  | 69.4                                                                                                | +     | +                                    | 1.1                                                               | +     |
| 28  | 107.0                                                                                               | +     | +                                    | >10                                                               | +     |
| 29  | 107.0                                                                                               | +     | +                                    | >10                                                               | +     |
| 30  | 96.0                                                                                                | +     | +                                    | 3.6                                                               | +     |
| 31  | 26.1                                                                                                | +     | +                                    | 0.7                                                               | +     |
| 32  | 107.0                                                                                               | +     | +                                    | 4.7                                                               | +     |
| 33  | 107.0                                                                                               | +     | +                                    | >10                                                               | +     |
| 34  | 117.5                                                                                               | +     | +                                    | 3.8                                                               | +     |
| 35  | 117.5                                                                                               | +     | +                                    | >10                                                               | +     |
| 36  | 71.7                                                                                                | +     | +                                    | 1.3                                                               | +     |
| 37  | 82.3                                                                                                | +     | +                                    | 1.5                                                               | +     |
| 38  | 32.1                                                                                                | +     | +                                    | 0.5                                                               | +     |
| 39  | 98.4                                                                                                | +     | +                                    | 6.3                                                               | +     |
| 40  | 98.4                                                                                                | +     | +                                    | >10                                                               | +     |
| 41  | 34.4                                                                                                | +     | +                                    | 0.49                                                              | +     |
| 42  | 40.9                                                                                                | +     | +                                    | 1.5                                                               | +     |
| 43  | 79.4                                                                                                | +     | +                                    | 1.2                                                               | +     |
| 44  | 98.4                                                                                                | +     | +                                    | 3.5                                                               | +     |
| 45  | 46.2                                                                                                | +     | +                                    | 0.8                                                               | +     |
| 46  | 96.4                                                                                                | +     | +                                    | 4.4                                                               | +     |
| 47  | 96.4                                                                                                | +     | +                                    | >10                                                               | +     |
| 48  | 41.2                                                                                                | +     | +                                    | 0.7                                                               | +     |
| 49  | 41.9                                                                                                | +     | +                                    | 0.8                                                               | +     |
| 50  | 31.0                                                                                                | +     | +                                    | 0.5                                                               | +     |

| No. | <b>MIKROGEN</b><br><i>recomWell</i> HEV IgG<br>(Positive<br>> 24 U/ml<br>Borderline<br>20 U/ml to 24 U/ml) |       | <b>MIKROGEN</b><br><i>recomLine</i> HEV IgG | <b>DiaSorin</b><br>LIAISON® MUREX Anti-HEV IgG<br>(Positive ≥ 0.3 IU/ml) |       |
|-----|------------------------------------------------------------------------------------------------------------|-------|---------------------------------------------|--------------------------------------------------------------------------|-------|
|     | [U/ml]                                                                                                     | qual. | qual.                                       | [IU/ml]                                                                  | qual. |
| 51  | 74.4                                                                                                       | +     | +                                           | 1.6                                                                      | +     |
| 52  | 92.4                                                                                                       | +     | +                                           | 5.9                                                                      | +     |
| 53  | 27.2                                                                                                       | +     | +                                           | 0.6                                                                      | +     |
| 54  | 28.1                                                                                                       | +     | +                                           | 0.5                                                                      | +     |
| 55  | 51.3                                                                                                       | +     | +                                           | 1.1                                                                      | +     |
| 56  | 97.6                                                                                                       | +     | +                                           | >10                                                                      | +     |
| 57  | 97.6                                                                                                       | +     | +                                           | >10                                                                      | +     |
| 58  | 97.6                                                                                                       | +     | +                                           | >10                                                                      | +     |
| 59  | 23.9                                                                                                       | (+)   | +                                           | 0.4                                                                      | +     |
| 60  | >125                                                                                                       | +     | +                                           | >10                                                                      | +     |
| 61  | >125                                                                                                       | +     | +                                           | 6.5                                                                      | +     |
| 62  | 23.9                                                                                                       | (+)   | +                                           | 0.3                                                                      | +     |
| 63  | 44.7                                                                                                       | +     | +                                           | 0.8                                                                      | +     |
| 64  | 73.0                                                                                                       | +     | +                                           | 1.6                                                                      | +     |
| 65  | >125                                                                                                       | +     | +                                           | >10                                                                      | +     |
| 66  | >125                                                                                                       | +     | +                                           | >10                                                                      | +     |
| 67  | 101.7                                                                                                      | +     | +                                           | 7.2                                                                      | +     |
| 68  | 101.7                                                                                                      | +     | +                                           | 3.6                                                                      | +     |
| 69  | 21.2                                                                                                       | (+)   | +                                           | 0.3                                                                      | +     |
| 70  | >125                                                                                                       | +     | +                                           | >10                                                                      | +     |
| 71  | >125                                                                                                       | +     | +                                           | >10                                                                      | +     |
| 72  | >125                                                                                                       | +     | +                                           | >10                                                                      | +     |
| 73  | 36.1                                                                                                       | +     | +                                           | 0.9                                                                      | +     |
| 74  | 60.2                                                                                                       | +     | +                                           | 1.5                                                                      | +     |
| 75  | 49.1                                                                                                       | +     | +                                           | 0.8                                                                      | +     |
| 76  | 85.5                                                                                                       | +     | +                                           | 1.9                                                                      | +     |
| 77  | 106.7                                                                                                      | +     | +                                           | >10                                                                      | +     |
| 78  | 34.2                                                                                                       | +     | +                                           | 0.6                                                                      | +     |
| 79  | 86.4                                                                                                       | +     | +                                           | 2.6                                                                      | +     |
| 80  | 122.7                                                                                                      | +     | +                                           | 8.5                                                                      | +     |
| 81  | 34.6                                                                                                       | +     | +                                           | 0.6                                                                      | +     |
| 82  | 35.7                                                                                                       | +     | +                                           | 0.5                                                                      | +     |
| 83  | 73.3                                                                                                       | +     | +                                           | 1.6                                                                      | +     |
| 84  | 25.4                                                                                                       | +     | +                                           | 0.4                                                                      | +     |
| 85  | >125                                                                                                       | +     | +                                           | >10                                                                      | +     |
| 86  | >125                                                                                                       | +     | +                                           | 5.0                                                                      | +     |
| 87  | >125                                                                                                       | +     | +                                           | >10                                                                      | +     |
| 88  | 103.2                                                                                                      | +     | +                                           | 9.8                                                                      | +     |
| 89  | 98.8                                                                                                       | +     | +                                           | >10                                                                      | +     |
| 90  | 92.3                                                                                                       | +     | +                                           | >10                                                                      | +     |
| 91  | 43.0                                                                                                       | +     | +                                           | 0.7                                                                      | +     |
| 92  | 38.5                                                                                                       | +     | +                                           | 0.4                                                                      | +     |
| 93  | 37.8                                                                                                       | +     | +                                           | 0.4                                                                      | +     |
| 94  | >125                                                                                                       | +     | +                                           | >10                                                                      | +     |
| 95  | 58.5                                                                                                       | +     | +                                           | 1.3                                                                      | +     |
| 96  | >125                                                                                                       | +     | +                                           | 5.2                                                                      | +     |
| 97  | 63.9                                                                                                       | +     | +                                           | 1.4                                                                      | +     |
| 98  | 84.7                                                                                                       | +     | +                                           | 2.0                                                                      | +     |
| 99  | 106.7                                                                                                      | +     | +                                           | >10                                                                      | +     |
| 100 | 66.3                                                                                                       | +     | +                                           | 1.4                                                                      | +     |

**Table S2:** Raw data for the comparison of the MIKROGEN (reference), DiaSorin and WANTAI HEV-IgM immunoassays. Samples with a discrepant result between the *recomWell* HEV IgM ELISA and the DiaSorin assay were retested with both assays and confirmed with the WANTAI HEV-IgM assay. Abbreviations: No., number; qual., qualitative; +, positive; (+), borderline; -, negative; n.t., not tested.

| No. | MIKROGEN<br><i>recomWell</i><br>HEV IgM<br><br>(Positive<br>> 24 U/ml<br>Borderline<br>20 U/ml to 24 U/ml) |       | MIKROGEN<br><i>recomLine</i><br>HEV IgM | DiaSorin<br>LIAISON® MUREX<br>Anti-HEV IgM<br><br>(Positive<br>Index ≥ 1.00) |       | WANTAI<br>HEV-IgM ELISA<br><br>(Positive<br>sample/cut-off<br>≥ 1.1<br>Borderline<br>Sample/cut-off<br>0.9 to 1.1) |       | RealStar®<br>HEV RT-PCR Kit 2.0 | MIKROGEN<br><i>recomWell</i><br>HEV IgG<br><br>(Positive<br>> 24 U/ml) |       |
|-----|------------------------------------------------------------------------------------------------------------|-------|-----------------------------------------|------------------------------------------------------------------------------|-------|--------------------------------------------------------------------------------------------------------------------|-------|---------------------------------|------------------------------------------------------------------------|-------|
|     | [U/ml]                                                                                                     | qual. | qual.                                   | [Index]                                                                      | qual. | sample/cut-off                                                                                                     | qual. | HEV RNA                         | [U/ml]                                                                 | qual. |
| 1   | 114.5                                                                                                      | +     | +                                       | 3.1                                                                          | +     | n.t.                                                                                                               | n.t.  | n.t.                            | 85.2                                                                   | +     |
| 2   | 83.7                                                                                                       | +     | -                                       | 2.8                                                                          | +     | n.t.                                                                                                               | n.t.  | n.t.                            | 85.2                                                                   | +     |
| 3   | >125                                                                                                       | +     | -                                       | 2.9                                                                          | +     | n.t.                                                                                                               | n.t.  | n.t.                            | >125                                                                   | +     |
| 4   | 100.7                                                                                                      | +     | +                                       | 1.7                                                                          | +     | n.t.                                                                                                               | n.t.  | n.t.                            | 98.7                                                                   | +     |
| 5   | 37.9                                                                                                       | +     | -                                       | 0.5                                                                          | -     | 0.3                                                                                                                | -     | -                               | 98.8                                                                   | +     |
| 6   | 37.2                                                                                                       | +     | -                                       | 0.8                                                                          | -     | 0.4                                                                                                                | -     | -                               | 98.8                                                                   | +     |
| 7   | 68.7                                                                                                       | +     | +                                       | 3.3                                                                          | +     | n.t.                                                                                                               | n.t.  | n.t.                            | 91.2                                                                   | +     |
| 8   | 43.0                                                                                                       | +     | -                                       | 0.5                                                                          | -     | 4.0                                                                                                                | +     | -                               | 98.8                                                                   | +     |
| 9   | 25.9                                                                                                       | +     | -                                       | 0.7                                                                          | -     | 1.2                                                                                                                | +     | -                               | 103.2                                                                  | +     |
| 10  | 33.7                                                                                                       | +     | -                                       | 1.3                                                                          | +     | n.t.                                                                                                               | n.t.  | n.t.                            | 89.3                                                                   | +     |
| 11  | 45.4                                                                                                       | +     | -                                       | 1.1                                                                          | +     | n.t.                                                                                                               | n.t.  | n.t.                            | >125                                                                   | +     |
| 12  | >125                                                                                                       | +     | +                                       | 9.1                                                                          | +     | n.t.                                                                                                               | n.t.  | n.t.                            | >125                                                                   | +     |
| 13  | 25.0                                                                                                       | +     | +                                       | 0.9                                                                          | -     | 2.6                                                                                                                | +     | -                               | >125                                                                   | +     |
| 14  | >125                                                                                                       | +     | +                                       | 9.1                                                                          | +     | n.t.                                                                                                               | n.t.  | n.t.                            | >125                                                                   | +     |
| 15  | 39.7                                                                                                       | +     | +                                       | 1.6                                                                          | +     | n.t.                                                                                                               | n.t.  | n.t.                            | 79.7                                                                   | +     |
| 16  | 93.4                                                                                                       | +     | +                                       | 5.4                                                                          | +     | n.t.                                                                                                               | n.t.  | n.t.                            | 92.3                                                                   | +     |
| 17  | 187.5                                                                                                      | +     | +                                       | 6.9                                                                          | +     | n.t.                                                                                                               | n.t.  | n.t.                            | 183.2                                                                  | +     |
| 18  | 98.4                                                                                                       | +     | +                                       | 1.7                                                                          | +     | n.t.                                                                                                               | n.t.  | n.t.                            | 117.5                                                                  | +     |
| 19  | 57.5                                                                                                       | +     | -                                       | 1.9                                                                          | +     | n.t.                                                                                                               | n.t.  | n.t.                            | 117.5                                                                  | +     |
| 20  | 35.7                                                                                                       | +     | +                                       | 1.5                                                                          | +     | n.t.                                                                                                               | n.t.  | n.t.                            | 14.7                                                                   | -     |
| 21  | 28.6                                                                                                       | +     | +                                       | 0.9                                                                          | -     | 1.1                                                                                                                | +     | -                               | 96.0                                                                   | +     |
| 22  | >125                                                                                                       | +     | +                                       | 4.0                                                                          | +     | n.t.                                                                                                               | n.t.  | n.t.                            | 107.0                                                                  | +     |
| 23  | 72.8                                                                                                       | +     | -                                       | 2.2                                                                          | +     | n.t.                                                                                                               | n.t.  | n.t.                            | 107.0                                                                  | +     |
| 24  | 34.2                                                                                                       | +     | -                                       | 1.4                                                                          | +     | n.t.                                                                                                               | n.t.  | n.t.                            | 107.0                                                                  | +     |
| 25  | 22.1                                                                                                       | (+)   | -                                       | 0.7                                                                          | -     | 1.7                                                                                                                | +     | -                               | 107.0                                                                  | +     |
| 26  | 27.4                                                                                                       | +     | -                                       | <0.1                                                                         | -     | <0.1                                                                                                               | -     | -                               | 4.0                                                                    | -     |
| 27  | 83.3                                                                                                       | +     | +                                       | 3.2                                                                          | +     | n.t.                                                                                                               | n.t.  | n.t.                            | 96.4                                                                   | +     |
| 28  | 24.5                                                                                                       | +     | -                                       | <0.1                                                                         | -     | <0.1                                                                                                               | -     | -                               | 2.3                                                                    | -     |
| 29  | 120.1                                                                                                      | +     | +                                       | 4.6                                                                          | +     | n.t.                                                                                                               | n.t.  | n.t.                            | 96.4                                                                   | +     |
| 30  | 23.9                                                                                                       | (+)   | +                                       | 0.6                                                                          | -     | 0.2                                                                                                                | -     | -                               | 32.1                                                                   | +     |
| 31  | 116.7                                                                                                      | +     | +                                       | 5.9                                                                          | +     | n.t.                                                                                                               | n.t.  | n.t.                            | 98.4                                                                   | +     |
| 32  | 22.4                                                                                                       | (+)   | -                                       | 0.5                                                                          | -     | 0.1                                                                                                                | -     | -                               | 92.4                                                                   | +     |

| No. | MIKROGEN<br><i>recomWell</i><br>HEV IgM<br><br>(Positive<br>> 24 U/ml<br>Borderline<br>20 U/ml to 24 U/ml) |       | MIKROGEN<br><i>recomLine</i><br>HEV IgM | DiaSorin<br>LIAISON® MUREX<br>Anti-HEV IgM<br><br>(Positive<br>Index ≥ 1.00) |       | WANTAI<br>HEV-IgM ELISA<br><br>(Positive<br>sample/cut-off<br>≥ 1.1<br>Borderline<br>Sample/cut-off<br>0.9 to 1.1) |       | RealStar®<br>HEV RT-PCR Kit 2.0 | MIKROGEN<br><i>recomWell</i><br>HEV IgG<br><br>(Positive<br>> 24 U/ml) |       |
|-----|------------------------------------------------------------------------------------------------------------|-------|-----------------------------------------|------------------------------------------------------------------------------|-------|--------------------------------------------------------------------------------------------------------------------|-------|---------------------------------|------------------------------------------------------------------------|-------|
|     | [U/ml]                                                                                                     | qual. | qual.                                   | [Index]                                                                      | qual. | sample/cut-off                                                                                                     | qual. | HEV RNA                         | [U/ml]                                                                 | qual. |
| 33  | 27.3                                                                                                       | +     | -                                       | 1.8                                                                          | +     | n.t.                                                                                                               | n.t.  | n.t.                            | 51.3                                                                   | +     |
| 34  | 104.4                                                                                                      | +     | +                                       | 1.6                                                                          | +     | n.t.                                                                                                               | n.t.  | n.t.                            | 92.4                                                                   | +     |
| 35  | 33.3                                                                                                       | +     | +                                       | 1.4                                                                          | +     | n.t.                                                                                                               | n.t.  | n.t.                            | 51.3                                                                   | +     |
| 36  | 46.3                                                                                                       | +     | -                                       | 1.1                                                                          | +     | n.t.                                                                                                               | n.t.  | n.t.                            | 97.6                                                                   | +     |
| 37  | 43.2                                                                                                       | +     | -                                       | 1.0                                                                          | +     | n.t.                                                                                                               | n.t.  | n.t.                            | >125                                                                   | +     |
| 38  | >125                                                                                                       | +     | +                                       | 8.7                                                                          | +     | n.t.                                                                                                               | n.t.  | n.t.                            | 27.5                                                                   | +     |
| 39  | 34.6                                                                                                       | +     | -                                       | 0.8                                                                          | -     | 1.7                                                                                                                | +     | -                               | >125                                                                   | +     |
| 40  | 22.3                                                                                                       | (+)   | +                                       | 1.8                                                                          | +     | n.t.                                                                                                               | n.t.  | n.t.                            | 3.0                                                                    | -     |
| 41  | >125                                                                                                       | +     | +                                       | 6.6                                                                          | +     | n.t.                                                                                                               | n.t.  | n.t.                            | >125                                                                   | +     |
| 42  | >125                                                                                                       | +     | +                                       | 3.0                                                                          | +     | n.t.                                                                                                               | n.t.  | n.t.                            | >125                                                                   | +     |
| 43  | 24.7                                                                                                       | +     | -                                       | 0.8                                                                          | -     | <0.1                                                                                                               | -     | -                               | 63.9                                                                   | +     |
| 44  | 31.6                                                                                                       | +     | -                                       | 0.6                                                                          | -     | 1.2                                                                                                                | +     | -                               | 101.7                                                                  | +     |
| 45  | 52.0                                                                                                       | +     | -                                       | 1.1                                                                          | +     | n.t.                                                                                                               | n.t.  | n.t.                            | 101.7                                                                  | +     |
| 46  | >125                                                                                                       | +     | +                                       | 7.0                                                                          | +     | n.t.                                                                                                               | n.t.  | n.t.                            | >125                                                                   | +     |
| 47  | 43.0                                                                                                       | +     | -                                       | 1.4                                                                          | +     | n.t.                                                                                                               | n.t.  | n.t.                            | >125                                                                   | +     |
| 48  | 26.0                                                                                                       | +     | -                                       | 0.7                                                                          | -     | 0.7                                                                                                                | -     | -                               | 85.5                                                                   | +     |
| 49  | 23.8                                                                                                       | (+)   | -                                       | 0.6                                                                          | -     | <0.1                                                                                                               | -     | -                               | 49.1                                                                   | +     |
| 50  | 66.1                                                                                                       | +     | +                                       | 2.2                                                                          | +     | n.t.                                                                                                               | n.t.  | n.t.                            | 106.7                                                                  | +     |
| 51  | 33.0                                                                                                       | +     | -                                       | 0.8                                                                          | -     | 1.1                                                                                                                | +     | -                               | 106.7                                                                  | +     |
| 52  | >125                                                                                                       | +     | +                                       | 8.2                                                                          | +     | n.t.                                                                                                               | n.t.  | n.t.                            | 122.7                                                                  | +     |
| 53  | >125                                                                                                       | +     | +                                       | 2.2                                                                          | +     | n.t.                                                                                                               | n.t.  | n.t.                            | >125                                                                   | +     |

**Table S3:** Raw data for the HEV antibody negative samples included in the study.

| Number | MIKROGEN<br><i>recomWell</i> HEV IgG<br>(Positive<br>> 24 U/ml<br>Borderline<br>20 U/ml to 24 U/ml) | DiaSorin<br>LIAISON® MUREX<br>Anti-HEV IgG<br>(Positive ≥ 0.3 IU/ml) | MIKROGEN<br><i>recomWell</i> HEV IgM<br>(Positive<br>> 24 U/ml<br>Borderline<br>20 U/ml to 24 U/ml) | DiaSorin<br>LIAISON® MUREX<br>Anti-HEV IgM<br>(Positive<br>Index ≥ 1.00) |
|--------|-----------------------------------------------------------------------------------------------------|----------------------------------------------------------------------|-----------------------------------------------------------------------------------------------------|--------------------------------------------------------------------------|
|        | [U/ml]                                                                                              | [IU/ml]                                                              | [U/ml]                                                                                              | [Index]                                                                  |
| 1      | 1.9                                                                                                 | <0.1                                                                 | 3.1                                                                                                 | <0.1                                                                     |
| 2      | 1.5                                                                                                 | 0.2                                                                  | 2.8                                                                                                 | <0.1                                                                     |
| 3      | 5.2                                                                                                 | <0.1                                                                 | 3.5                                                                                                 | <0.1                                                                     |
| 4      | 9.2                                                                                                 | 0.3                                                                  | 2.8                                                                                                 | 0.2                                                                      |
| 5      | 1.5                                                                                                 | <0.1                                                                 | 3.8                                                                                                 | 0.1                                                                      |
| 6      | 2.6                                                                                                 | <0.1                                                                 | 7.8                                                                                                 | <0.1                                                                     |
| 7      | 3.4                                                                                                 | <0.1                                                                 | 4.3                                                                                                 | 0.1                                                                      |
| 8      | 2.5                                                                                                 | <0.1                                                                 | 2.2                                                                                                 | <0.1                                                                     |
| 9      | 2.1                                                                                                 | <0.1                                                                 | 3.0                                                                                                 | 0.4                                                                      |
| 10     | 2.1                                                                                                 | <0.1                                                                 | 10.6                                                                                                | <0.1                                                                     |
| 11     | 2.7                                                                                                 | <0.1                                                                 | 2.2                                                                                                 | <0.1                                                                     |
| 12     | 2.5                                                                                                 | <0.1                                                                 | 5.4                                                                                                 | <0.1                                                                     |
| 13     | 2.2                                                                                                 | <0.1                                                                 | 1.5                                                                                                 | <0.1                                                                     |
| 14     | 10.3                                                                                                | 0.1                                                                  | 5.4                                                                                                 | 0.2                                                                      |
| 15     | 2.8                                                                                                 | <0.1                                                                 | 2.0                                                                                                 | <0.1                                                                     |
| 16     | 3.4                                                                                                 | <0.1                                                                 | 1.5                                                                                                 | <0.1                                                                     |
| 17     | 2.9                                                                                                 | <0.1                                                                 | 2.5                                                                                                 | <0.1                                                                     |
| 18     | 1.7                                                                                                 | <0.1                                                                 | 7.9                                                                                                 | 0.3                                                                      |
| 19     | 2.6                                                                                                 | <0.1                                                                 | 3.2                                                                                                 | <0.1                                                                     |
| 20     | 1.9                                                                                                 | <0.1                                                                 | 2.5                                                                                                 | <0.1                                                                     |
| 21     | 8.8                                                                                                 | 0.1                                                                  | 2.7                                                                                                 | <0.1                                                                     |
| 22     | 1.8                                                                                                 | <0.1                                                                 | 1.9                                                                                                 | <0.1                                                                     |
| 23     | 1.2                                                                                                 | <0.1                                                                 | 1.7                                                                                                 | <0.1                                                                     |
| 24     | 2.0                                                                                                 | <0.1                                                                 | 2.5                                                                                                 | <0.1                                                                     |
| 25     | 2.2                                                                                                 | <0.1                                                                 | 1.8                                                                                                 | <0.1                                                                     |
| 26     | 1.2                                                                                                 | <0.1                                                                 | 2.1                                                                                                 | <0.1                                                                     |
| 27     | 1.3                                                                                                 | <0.1                                                                 | 2.0                                                                                                 | <0.1                                                                     |
| 28     | 2.2                                                                                                 | <0.1                                                                 | 2.4                                                                                                 | <0.1                                                                     |
| 29     | 1.7                                                                                                 | <0.1                                                                 | 2.8                                                                                                 | <0.1                                                                     |
| 30     | 14.6                                                                                                | 0.2                                                                  | 2.1                                                                                                 | <0.1                                                                     |
| 31     | 11.2                                                                                                | 0.1                                                                  | 2.7                                                                                                 | <0.1                                                                     |
| 32     | 12.0                                                                                                | 0.2                                                                  | 2.3                                                                                                 | <0.1                                                                     |
| 33     | 19.2                                                                                                | 0.2                                                                  | 1.8                                                                                                 | <0.1                                                                     |
| 34     | 2.0                                                                                                 | <0.1                                                                 | 2.4                                                                                                 | <0.1                                                                     |
| 35     | 4.5                                                                                                 | <0.1                                                                 | 4.6                                                                                                 | <0.1                                                                     |
| 36     | 9.9                                                                                                 | <0.1                                                                 | 8.2                                                                                                 | <0.1                                                                     |
| 37     | 5.4                                                                                                 | <0.1                                                                 | 4.3                                                                                                 | <0.1                                                                     |
| 38     | 5.1                                                                                                 | 0.2                                                                  | 2.6                                                                                                 | <0.1                                                                     |
| 39     | 6.1                                                                                                 | <0.1                                                                 | 4.4                                                                                                 | <0.1                                                                     |
| 40     | 3.6                                                                                                 | <0.1                                                                 | 6.7                                                                                                 | 0.8                                                                      |
| 41     | 2.3                                                                                                 | <0.1                                                                 | 7.9                                                                                                 | 0.4                                                                      |
| 42     | 3.6                                                                                                 | <0.1                                                                 | 5.8                                                                                                 | <0.1                                                                     |
| 43     | 5.5                                                                                                 | <0.1                                                                 | 4.4                                                                                                 | 0.1                                                                      |
| 44     | 3.4                                                                                                 | <0.1                                                                 | 2.3                                                                                                 | <0.1                                                                     |
| 45     | 4.3                                                                                                 | <0.1                                                                 | 5.7                                                                                                 | <0.1                                                                     |
| 46     | 3.2                                                                                                 | <0.1                                                                 | 4.3                                                                                                 | 0.3                                                                      |
| 47     | 3.9                                                                                                 | <0.1                                                                 | 2.4                                                                                                 | <0.1                                                                     |
| 48     | 5.0                                                                                                 | 0.1                                                                  | 5.2                                                                                                 | 0.1                                                                      |
| 49     | 3.1                                                                                                 | <0.1                                                                 | 3.4                                                                                                 | <0.1                                                                     |

**Table S4:** Raw data for the HEV IgG linearity studies. For all three investigated samples individual as well as mean values are given. Some sera dilutions around the cut-off of the *recomWell* HEV IgG test were also investigated with the *recomLine* HEV IgG immunoblot. Abbreviations: +, positive; -, negative; n.t., not tested.

| Sample | Dilution  | MIKROGEN<br><i>recomWell</i> HEV IgG<br>Positive<br>> 24 U/ml<br>Borderline<br>20 U/ml to 24 U/ml |             | MIKROGEN<br><i>recomLine</i> HEV IgG | DiaSorin<br>LIAISON® MUREX<br>Anti-HEV IgG<br>Positive ≥ 0.3 IU/ml |              |
|--------|-----------|---------------------------------------------------------------------------------------------------|-------------|--------------------------------------|--------------------------------------------------------------------|--------------|
|        |           | [U/ml]                                                                                            | Mean [U/ml] |                                      | [IU/ml]                                                            | Mean [IU/ml] |
| # 1    | undiluted | 81.9                                                                                              | 81.9        | n.t.                                 | >10                                                                | >10          |
|        |           | 81.9                                                                                              |             |                                      | >10                                                                |              |
|        | 1:2       | 81.9                                                                                              | 81.9        | n.t.                                 | 9.5                                                                | >10          |
|        |           | 81.9                                                                                              |             |                                      | >10                                                                |              |
|        | 1:4       | 81.9                                                                                              | 81.9        | n.t.                                 | 4.6                                                                | 4.6          |
|        |           | 81.9                                                                                              |             |                                      | 4.6                                                                |              |
|        | 1:8       | 81.9                                                                                              | 81.9        | n.t.                                 | 2.0                                                                | 2.0          |
|        |           | 81.9                                                                                              |             |                                      | 2.0                                                                |              |
|        | 1:16      | 57.7                                                                                              | 56.4        | +                                    | 1.0                                                                | 1.0          |
|        |           | 55.0                                                                                              |             |                                      | 1.0                                                                |              |
|        | 1:32      | 34.2                                                                                              | 34.1        | -                                    | 0.5                                                                | 0.5          |
|        |           | 34.1                                                                                              |             |                                      | 0.5                                                                |              |
|        | 1:64      | 19.6                                                                                              | 18.9        | -                                    | 0.2                                                                | 0.2          |
|        |           | 18.2                                                                                              |             |                                      | 0.2                                                                |              |
| # 2    | undiluted | 79.0                                                                                              | 79.0        | n.t.                                 | >10                                                                | >10          |
|        |           | 79.0                                                                                              |             |                                      | >10                                                                |              |
|        | 1:2       | 79.0                                                                                              | 79.0        | n.t.                                 | 4.7                                                                | 5.1          |
|        |           | 79.0                                                                                              |             |                                      | 5.5                                                                |              |
|        | 1:4       | 79.0                                                                                              | 79.0        | n.t.                                 | 2.3                                                                | 2.3          |
|        |           | 79.0                                                                                              |             |                                      | 2.3                                                                |              |
|        | 1:8       | 65.9                                                                                              | 66.9        | n.t.                                 | 1.1                                                                | 1.2          |
|        |           | 67.8                                                                                              |             |                                      | 1.2                                                                |              |
|        | 1:16      | 44.2                                                                                              | 42.0        | +                                    | 0.6                                                                | 0.6          |
|        |           | 39.7                                                                                              |             |                                      | 0.6                                                                |              |
|        | 1:32      | 24.6                                                                                              | 23.6        | +                                    | 0.3                                                                | 0.4          |
|        |           | 22.5                                                                                              |             |                                      | 0.4                                                                |              |
|        | 1:64      | 14.0                                                                                              | 14.3        | n.t.                                 | 0.2                                                                | 0.2          |
|        |           | 14.6                                                                                              |             |                                      | 0.2                                                                |              |
| # 3    | undiluted | 79.0                                                                                              | 79.0        | n.t.                                 | 9.4                                                                | 9.2          |
|        |           | 79.0                                                                                              |             |                                      | 9.1                                                                |              |
|        | 1:2       | 79.0                                                                                              | 79.0        | n.t.                                 | 3.8                                                                | 3.6          |
|        |           | 79.0                                                                                              |             |                                      | 3.4                                                                |              |
|        | 1:4       | 79.0                                                                                              | 79.0        | n.t.                                 | 1.7                                                                | 1.7          |
|        |           | 79.0                                                                                              |             |                                      | 1.6                                                                |              |
|        | 1:8       | 61.4                                                                                              | 60.0        | n.t.                                 | 0.9                                                                | 0.9          |
|        |           | 58.7                                                                                              |             |                                      | 0.8                                                                |              |
|        | 1:16      | 39.0                                                                                              | 38.7        | +                                    | 0.4                                                                | 0.4          |
|        |           | 38.3                                                                                              |             |                                      | 0.4                                                                |              |
|        | 1:32      | 24.6                                                                                              | 24.1        | -                                    | 0.3                                                                | 0.3          |
|        |           | 23.5                                                                                              |             |                                      | 0.3                                                                |              |
|        | 1:64      | 13.9                                                                                              | 13.7        | n.t.                                 | 0.1                                                                | 0.2          |
|        |           | 13.5                                                                                              |             |                                      | 0.2                                                                |              |
